# Supplementary material for: Mitochondrial Respiratory Capacity is Restored in Hibernating Cardiomyocytes Following Co-Culture with Mesenchymal Stem Cells
Source: PubMed Central journal article supplement — Cell Med. 2019 Mar 6;11:2155179019834938. doi: 10.1177/2155179019834938 (PMC6404044; doi:10.1177/2155179019834938), 2019-03-06
Supplement: Supplemental_Material.pdf [file Supplemental_Material.pdf]

## Supplemental Methods:

**Table 1.** Primers used for qRT-PCR.

| Gene ID          | Accession Number | Forward Primer        | Reverse Primer       |
|------------------|------------------|-----------------------|----------------------|
| NDUFB8           | NM_001106360.2   | GAGCCGTACCCAGATGATGG  | CTTGGGAAGGATCACCGCCT |
| SDHB             | NM_001100539.1   | GCCATGAACATCAACGGAGG  | GCAGATACTGTTGCTTGCCC |
| UQCRC2           | NM_001006970.1   | GACCGTAGGAAAGGGCAACT  | TGGGGCAACTTTGAGGGAAT |
| mt-Co1<br>(COX1) | KP993068.1       | TCACAGCCCATGCATTTCGTA | GCTAGGTTTCCGGCTAAGGG |
| ATP5F1A          | NM_023093.1      | TCCAAGCAGGCTGTTGCTTA  | AGCAGGCGAGAGTGTAGGTA |

## Supplemental Figure 1. Confirmation of MSC Phenotype by Flow Cytometry

Following isolation from bone marrow and culture to passage 3, swine MSC phenotype was confirmed by flow cytometry by staining for CD45 negative (eBiosciences #11-9459), CD90 positive (BD Biosciences, #BD559869), and CD105 positive (Abcam #ab53321).

### A) Flow Cytometry to Confirm MSC Phenotype

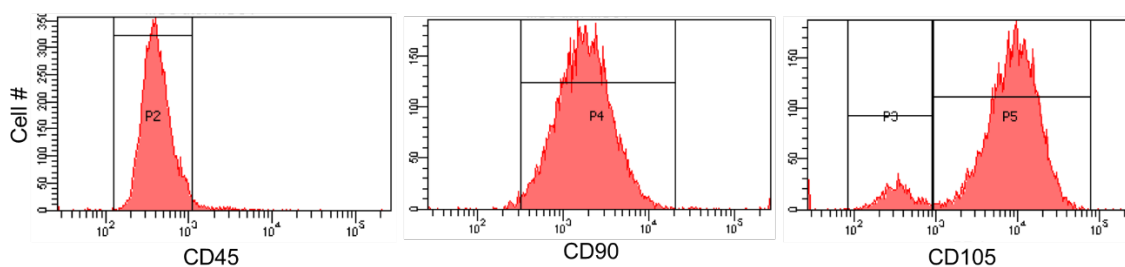

### B) Isotype Controls of MSC Phenotype Panel

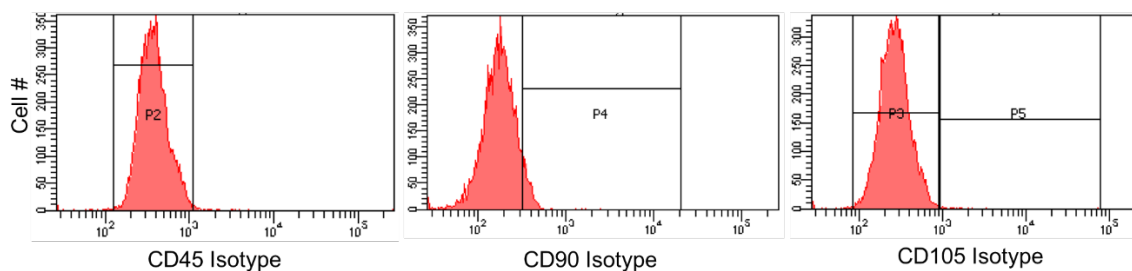

## Supplemental Figure 2. Transwell co-culture of MSCs and H9C2 cells.

All co-culture experiments were conducted using a transwell co-culture system consisting of a removable insert with a microporous membrane, preventing direct cell-cell contact but allowing paracrine signaling between cell types. Prior to measurement of mitochondrial respiration in H9C2 cells, the transwell insert containing MSCs was removed.

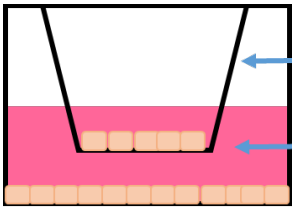

Transwell insert  
(removable)

MSCs cultured on  
microporous membrane

H9C2s cultured in  
lower compartment
